# Supplementary material for: Enriching surface oxygen vacancies of spinel Co3O4 to boost H2O adsorption for HER in alkaline media
Source: Royal Society of Chemistry journal article supplement (doi:10.1039/d1ma00566a), 2021-01-01
Supplement: d1ma00566a1.pdf [file d1ma00566a1.pdf]

## Electronic Supplementary Information

### Enriching surface oxygen vacancies of spinel $\text{Co}_3\text{O}_4$ to boost $\text{H}_2\text{O}$ adsorption for HER in alkaline media

*Ting Zhu, <sup>\*a</sup> Jun Pan, <sup>a</sup> Ying Xiao, <sup>a</sup> Anqiang Pan<sup>a</sup> and Shuquan Liang<sup>\*a</sup>*

*<sup>a</sup> School of Materials Science & Engineering, Central South University, Changsha 410083, Hunan, China.*

*Email: [zhut0002@csu.edu.cn](mailto:zhut0002@csu.edu.cn) (T. Zhu); [lsq@csu.edu.cn](mailto:lsq@csu.edu.cn) (S. Q. Liang)*

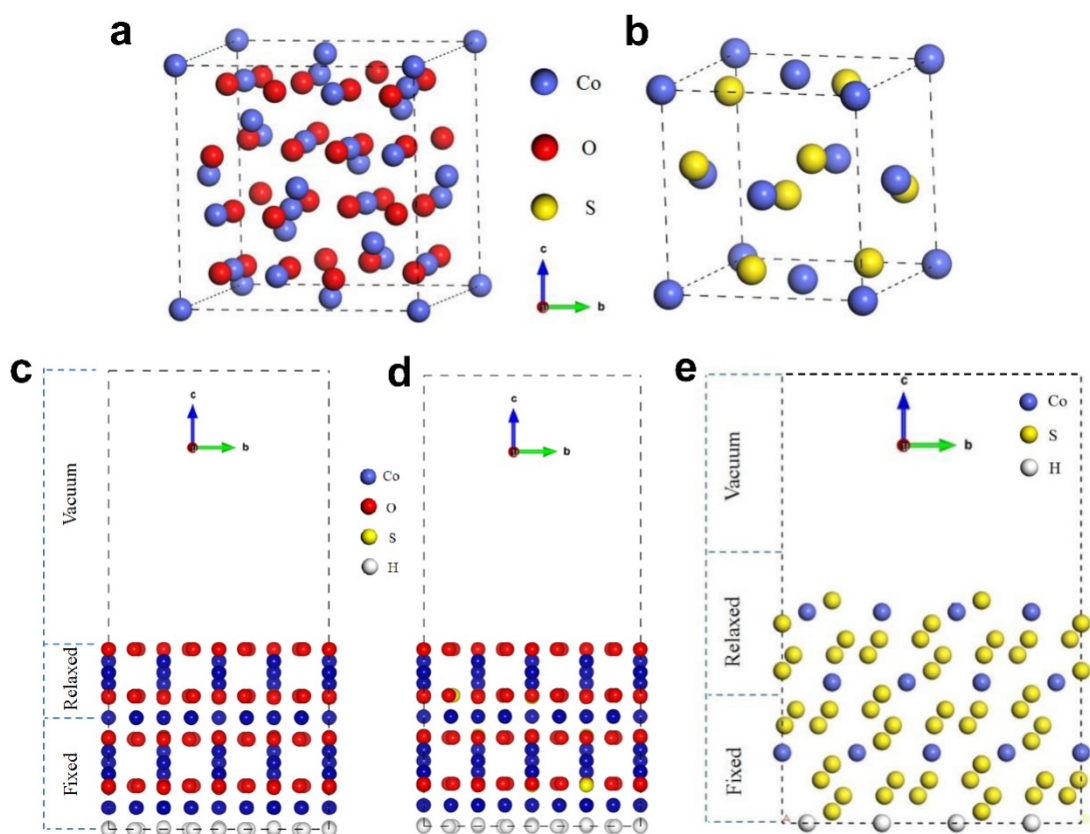

**Fig. S1.** Simulation models: bulk lattice structures of  $\text{Co}_3\text{O}_4$  (a) and  $\text{CoS}_2$  (b); Co-O terminals of  $\text{Co}_3\text{O}_4$  (111) (c) and  $\text{CoO}_{0.88}\text{S}_{0.11}$  (111) (d), and Co-S terminal  $\text{CoS}_2$  (111) (e).

Based on the bulk lattice structures of  $\text{Co}_3\text{O}_4$  and  $\text{CoS}_2$ , a vacuum layer of  $15 \text{ \AA}$  was added to exclude the periodic boundary interference in Z axis. The H layers at the bottom were added to remove the interference from surface Co-O or Co-S terminals.

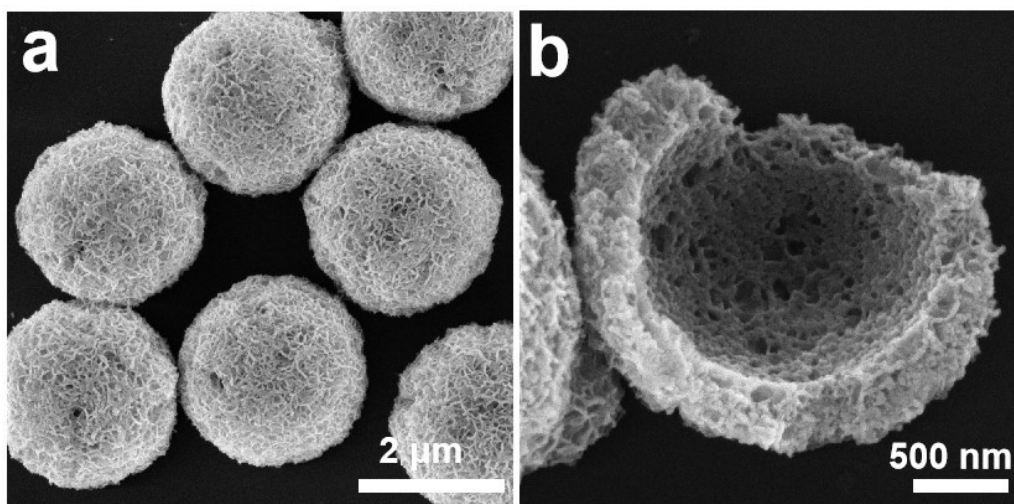

**Fig. S2.** SEM images of the CBP PS.

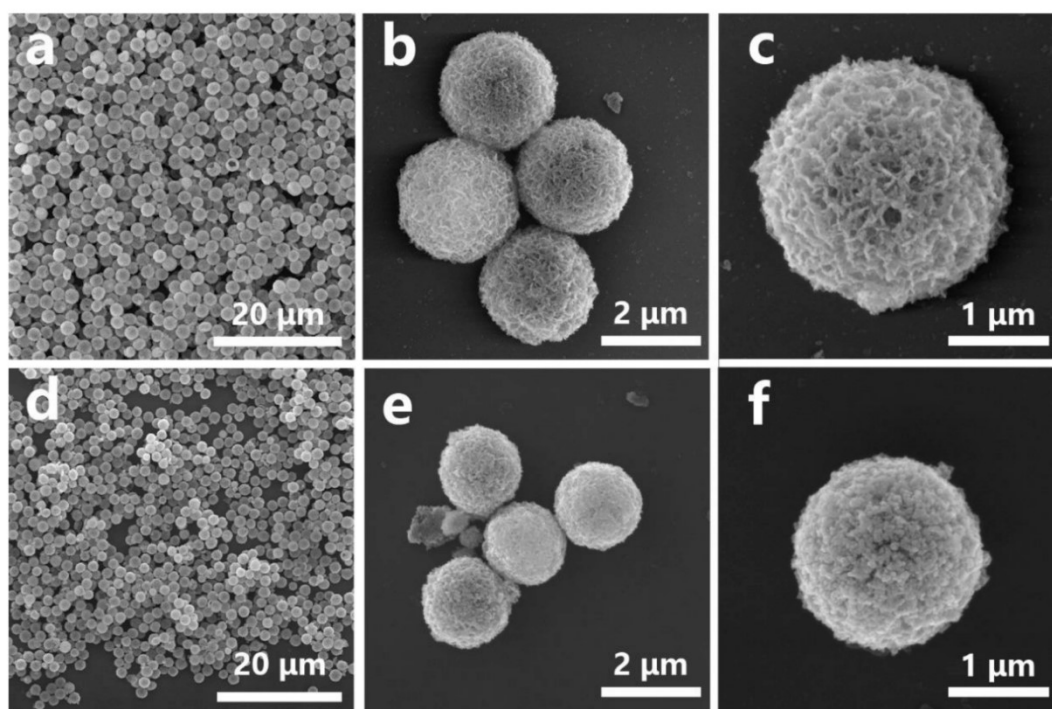

**Fig. S3.** SEM images of the  $\text{Co}_3\text{O}_4$  (a-c) and  $\text{CoS}_2$  (d-e) derived from CBP PS.

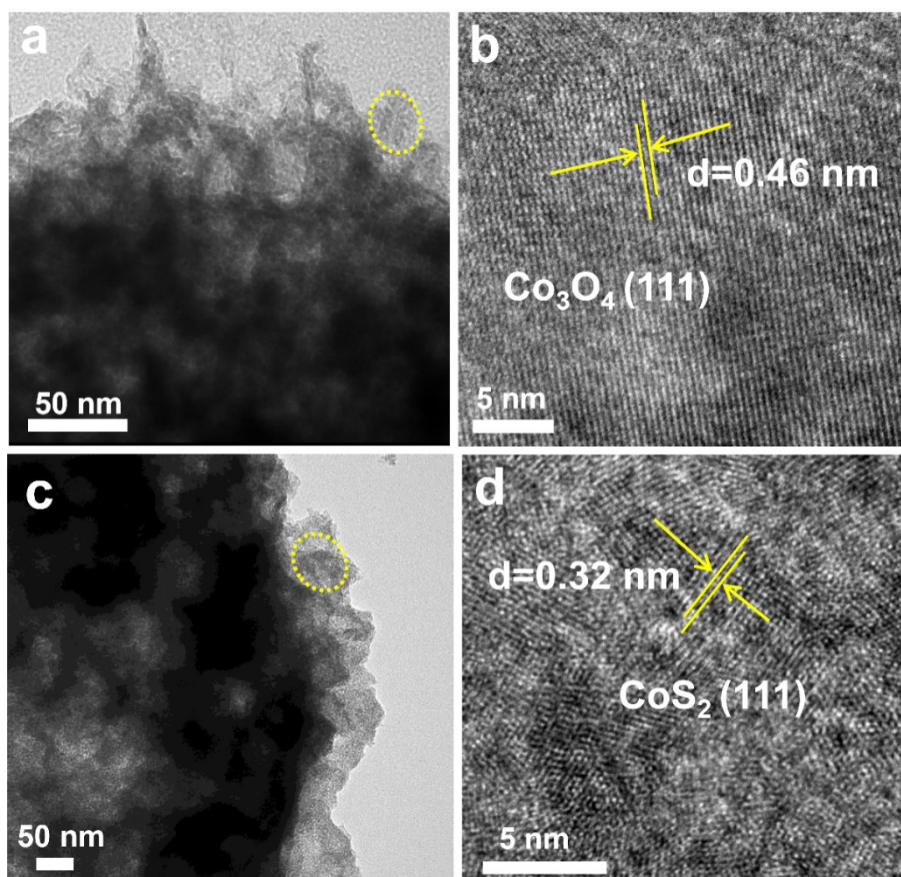

Fig. S4. TEM (a, c) and HR-TEM (b, d) images of the  $\text{Co}_3\text{O}_4$  (a, b) and  $\text{CoS}_2$  (c, d).

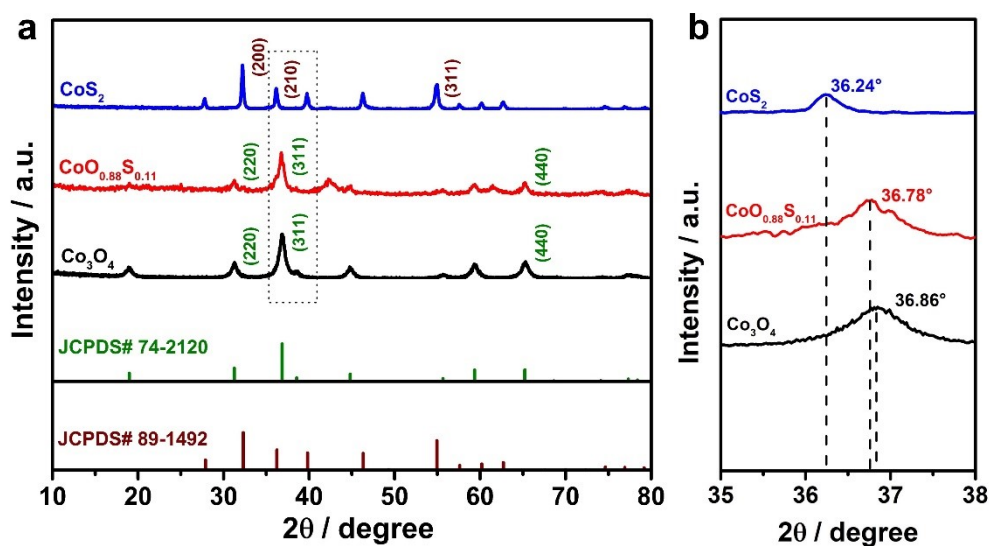

Fig. S5. XRD patterns of the as-synthesized  $\text{CoS}_2$ ,  $\text{CoO}_{0.88}\text{S}_{0.11}$ , and  $\text{Co}_3\text{O}_4$  samples.

The XRD peak of  $\text{Co}_3\text{O}_4$  (311) was shifted from  $36.86^\circ$  to  $36.78^\circ$  after introduction of S atoms, indicating the expansion of (311) lattice spacing in the presence of S atoms.

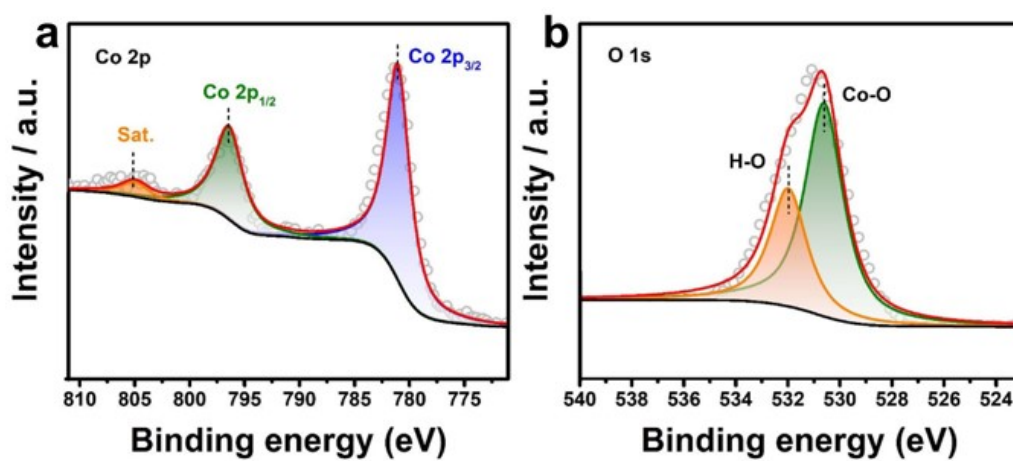

**Fig. S6.** XPS results of Co 2p (a), and O 1s (b) of the pristine  $\text{Co}_3\text{O}_4$  sample.

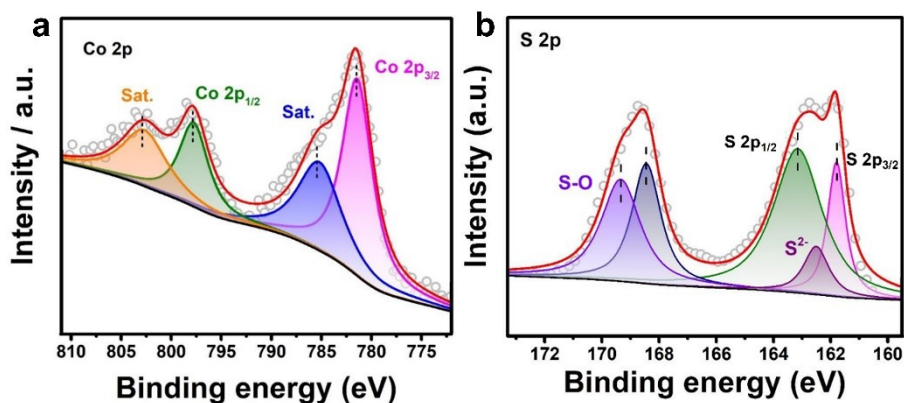

**Fig. S7.** XPS results of Co 2p (a), and S 2p (b) of the CoS<sub>2</sub> sample.

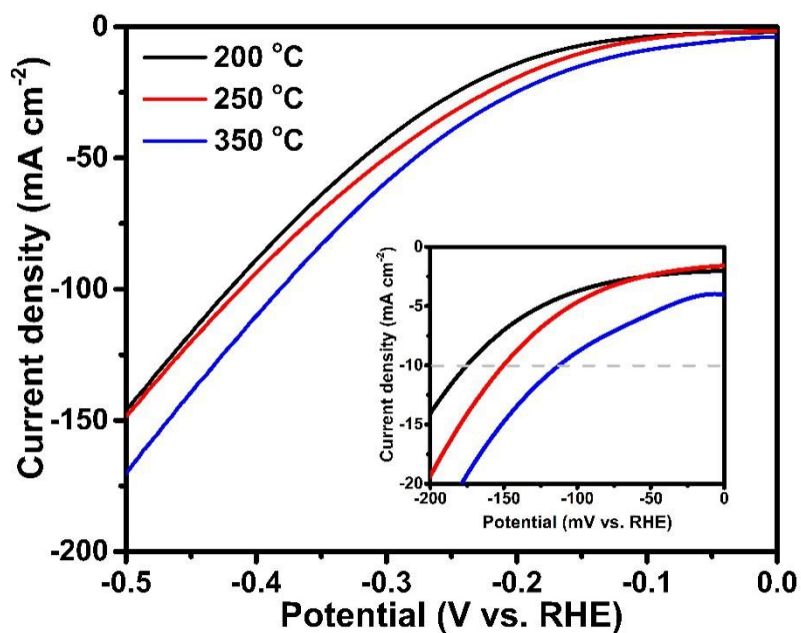

**Fig. S8.** LSV curves of the partially sulfurized samples obtained from 200, 250, and 350 °C. The inset is a magnified LSV region that shows the current density of 10 mA cm<sup>-2</sup>.

The LSV curves reveal that OP@10 mA cm<sup>-2</sup> decreases when the sulfurization temperature increases, which is consistent with the ESR results of Fig. 3d.

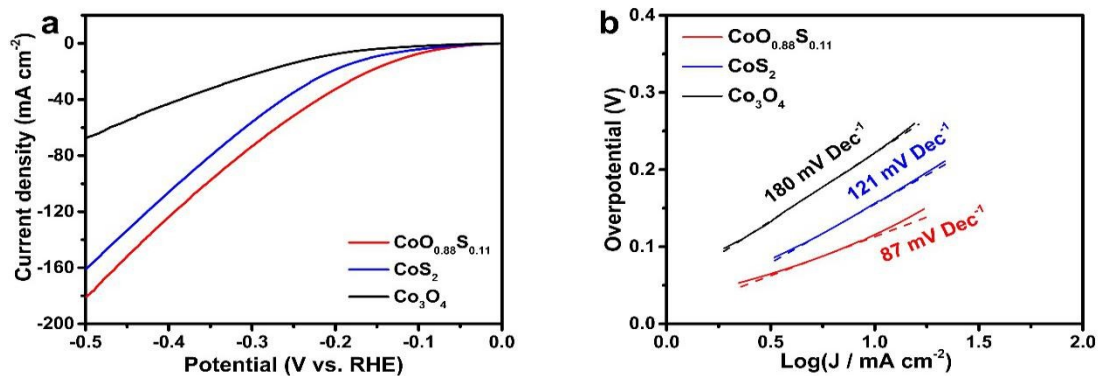

**Fig. S9.** LSV curves (a) , and Tafel plots (b) of the  $\text{CoO}_{0.88}\text{S}_{0.11}$ ,  $\text{CoS}_2$ , and  $\text{Co}_3\text{O}_4$  samples, respectively. The electrolyte used is 0.5 M of  $\text{H}_2\text{SO}_4$  aqueous solution.

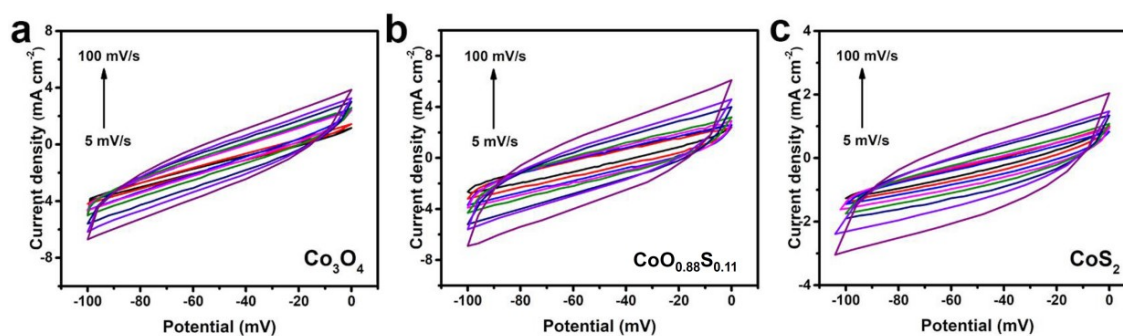

**Fig. S10.** CV curves obtained from various scan rates with the same non-Faradaic potential region of -0.1 - 0 V (vs. SCE) for all the three samples.

The CV measurements were performed within a non-Faradaic potential region to estimate the electrochemical double-layer capacitance.

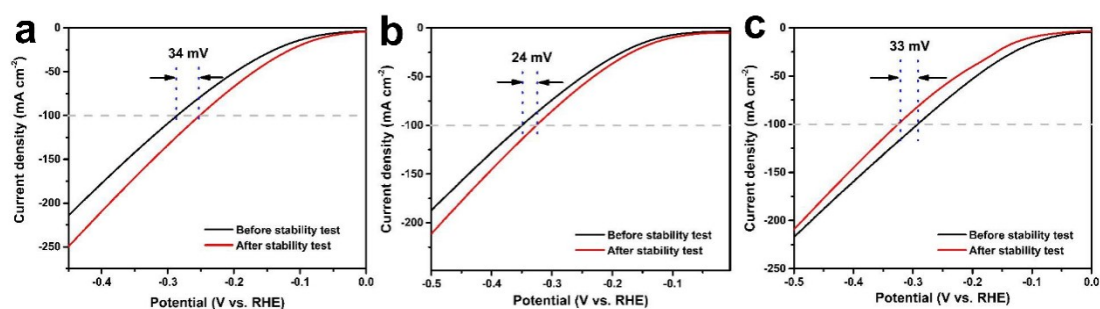

**Fig. S11.** LSV curves obtained before and after stability tests (for 12 h) for the samples Co<sub>3</sub>O<sub>4</sub> (a), CoO<sub>0.88</sub>S<sub>0.11</sub> (b), and CoS<sub>2</sub> (c), respectively.

The overpotential differences ( $\Delta\eta = \text{OP}_{\text{after}} - \text{OP}_{\text{before}}$ ) of  $\eta_{100}$  are -34, -24, and 33 mV for the samples Co<sub>3</sub>O<sub>4</sub>, CoO<sub>0.88</sub>S<sub>0.11</sub>, and CoS<sub>2</sub>, respectively. The results indicate that the catalytic activities for Co<sub>3</sub>O<sub>4</sub> and CoO<sub>0.88</sub>S<sub>0.11</sub> are improved after stability tests, but deteriorated for CoS<sub>2</sub>.



**Table S1.** Comparison table of the previously reported electrocatalysts for HER.

| Catalysts                                              | Electrolyte                          | Morphology | $\eta_{10}$<br>(mV) | Tafel slope<br>(mV Dec <sup>-1</sup> ) | Ref.      |
|--------------------------------------------------------|--------------------------------------|------------|---------------------|----------------------------------------|-----------|
| CoO <sub>0.88</sub> S <sub>0.11</sub>                  | 1 M KOH                              | spheres    | 83                  | 80                                     | this work |
| CoO <sub>0.88</sub> S <sub>0.11</sub>                  | 0.5 M H <sub>2</sub> SO <sub>4</sub> | spheres    | 116                 | 87                                     | this work |
| CoS@CoNi-LDH/CC                                        | 1 M KOH                              | nanorods   | 124                 | 89                                     | 1         |
| Co <sub>3</sub> S <sub>4</sub>                         | 1 M KOH                              | nanosheets | 163                 | 103                                    | 2         |
| meso CoSSe                                             | 0.5 M H <sub>2</sub> SO <sub>4</sub> | spheres    | 110                 | 52                                     | 3         |
| Ru/Ti <sub>3</sub> C <sub>2</sub> T <sub>x</sub>       | 0.1 M HClO <sub>4</sub>              | nanosheets | 70                  | 76                                     | 4         |
| CoSe <sub>2</sub>                                      | 1 M KOH                              | nanotubes  | 124                 | 66                                     | 5         |
| Co <sub>9</sub> S <sub>8</sub> /CC                     | 0.5 M H <sub>2</sub> SO <sub>4</sub> | nanosheets | 150                 | -                                      | 6         |
| Co(S <sub>0.73</sub> Se <sub>0.27</sub> ) <sub>2</sub> | 0.5 M H <sub>2</sub> SO <sub>4</sub> | nanowires  | 104                 | 45                                     | 7         |
| CoS <sub>2</sub> /RGO-CNT                              | 0.5 M H <sub>2</sub> SO <sub>4</sub> | nanosheets | 142                 | 51                                     | 8         |

## References

1. ACS Applied Materials & Interfaces, 2020, 12, 33595-33602.
2. ACS Catalysis, 2018, 8, 8077-8083.
3. ACS Catalysis, 2019, 9, 456-465.
4. Small, 2020, 16, 2002888. (Note: **Ru metal was used!**)
5. Journal of Materials Chemistry A, 2017, 5, 4513-4526.
6. Journal of Materials Chemistry A, 2016, 4, 6860-6867.
7. Nano Energy, 2015, 18, 1-11.

8. *Angewandte Chemie International Edition*, 2014, 126, 12802 -12807.
